# Supplementary material for: Chelation-Assisted Ion-Exchange Leaching of Rare Earths from Clay Minerals
Source: MDPI journal article supplement (doi:10.3390/met11081265), 2021-08-11
Supplement: s1 [file s1]

Archive with 2 entries (2 files):
- metals-1297637-supplementary1-to authors.pdf
- metals-1297637-supplementary2-to authors.pdf
