# Supplementary material for: Chelation-Assisted Ion-Exchange Leaching of Rare Earths from Clay Minerals
Source: MDPI journal article supplement (doi:10.3390/met11081265), 2021-08-11
Supplement: s1 [file s1 › metals-1297637-supplementary1-to authors.pdf]

# Chelation-Assisted Ion-Exchange Leaching of Rare Earths from Clay Minerals

Georgiana Moldoveanu and Vladimiros Papangelakis \*

Department of Chemical Engineering and Applied Chemistry, University of Toronto, 200 College Street,

Toronto, ON M5S 3E5, Canada; georgiana.moldoveanu@utoronto.ca

\* Correspondence: vladimiros.papangelakis@utoronto.ca; Tel.: +1-416-978-1093

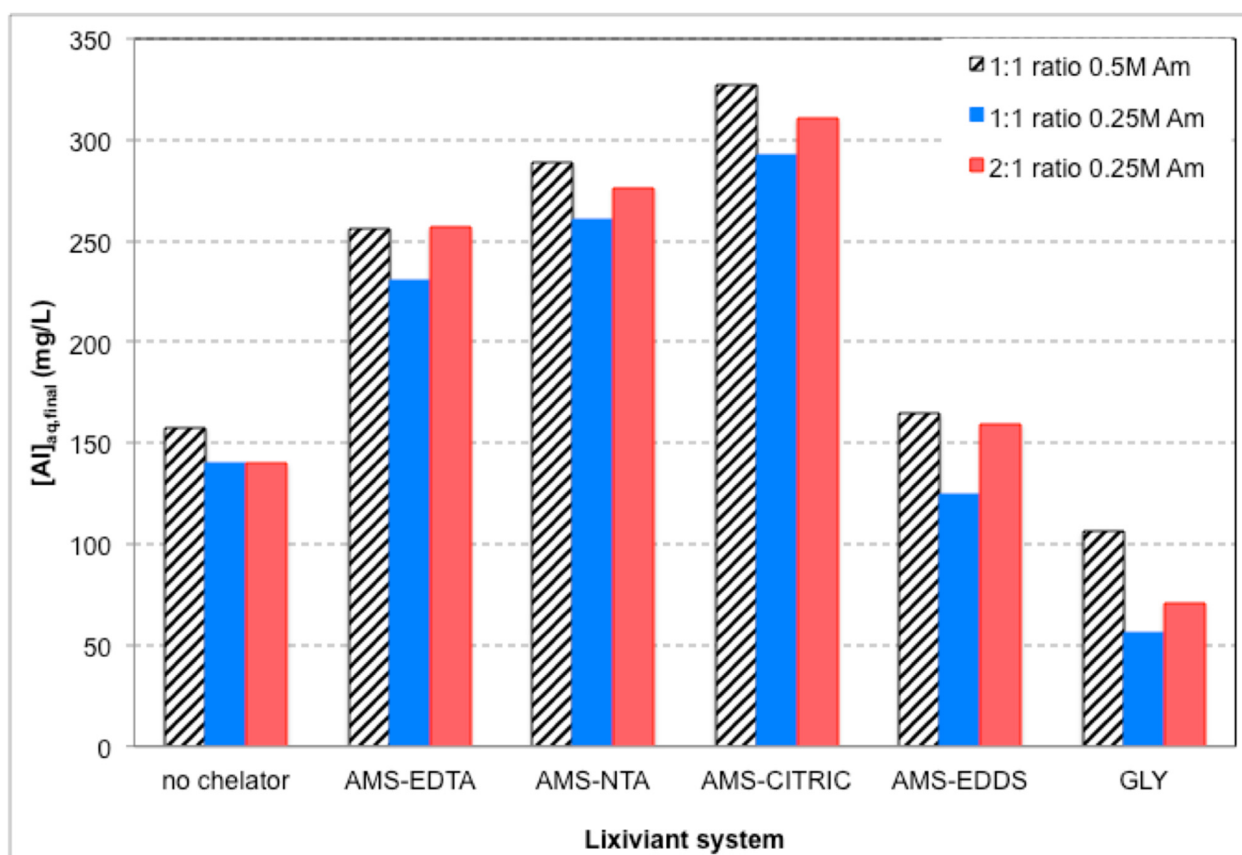

**Figure S1.** Comparison of Aluminum extraction at various ratios of lixiviant (ammonium sulphate, Am, containing 0.25 mol/L  $\text{NH}_4^+$  ions) and chelating agents.
