# Supplementary material for: Chelation-Assisted Ion-Exchange Leaching of Rare Earths from Clay Minerals
Source: MDPI journal article supplement (doi:10.3390/met11081265), 2021-08-11
Supplement: s1 [file s1 › metals-1297637-supplementary2-to authors.pdf]

# Chelation-Assisted Ion-Exchange Leaching of Rare Earths from Clay Minerals

Georgiana Moldoveanu and Vladimiro Papangelakis \*

Department of Chemical Engineering and Applied Chemistry, University of Toronto, 200 College Street,

Toronto, ON M5S 3E5, Canada; georgiana.moldoveanu@utoronto.ca

\* Correspondence: vladimiro.papangelakis@utoronto.ca; Tel.: +1-416-978-1093

**Table S1.** Individual rare earth extraction levels with 0.25 mol/L  $(\text{NH}_4)_2\text{SO}_4$  (AMS) in the presence of various chelating agents (1:1 ratio)

| REE  | Total Extraction (%) (leaching + washing) |                          |                                   |                                     |                                  |                                   |                                            |                                  |                                  |                                                     |
|------|-------------------------------------------|--------------------------|-----------------------------------|-------------------------------------|----------------------------------|-----------------------------------|--------------------------------------------|----------------------------------|----------------------------------|-----------------------------------------------------|
|      | 0.5M<br>$\text{NH}_4^+$                   | 0.25M<br>$\text{NH}_4^+$ | EDTA-<br>0.25M<br>$\text{NH}_4^+$ | CITRIC<br>-0.25M<br>$\text{NH}_4^+$ | NTA-<br>0.25M<br>$\text{NH}_4^+$ | EDDS-<br>0.25M<br>$\text{NH}_4^+$ | L-<br>AspAcid-<br>0.25M<br>$\text{NH}_4^+$ | GLY-<br>0.25M<br>$\text{NH}_4^+$ | ASP-<br>0.25M<br>$\text{NH}_4^+$ | NTA-<br>$\text{Na}_3$ -<br>0.25M<br>$\text{NH}_4^+$ |
| La   | 95                                        | 85                       | 97                                | 88                                  | 90                               | 95                                | 95                                         | 86                               | 89                               | 98                                                  |
| Ce   | 13                                        | 11                       | 14                                | 11                                  | 13                               | 12                                | 12                                         | 11                               | 12                               | 14                                                  |
| Pr   | 50                                        | 46                       | 56                                | 49                                  | 52                               | 52                                | 52                                         | 46                               | 49                               | 55                                                  |
| Nd   | 93                                        | 82                       | 98                                | 87                                  | 92                               | 92                                | 88                                         | 81                               | 84                               | 95                                                  |
| Sm   | 90                                        | 82                       | 91                                | 85                                  | 93                               | 90                                | 88                                         | 80                               | 81                               | 94                                                  |
| Eu   | 79                                        | 76                       | 73                                | 71                                  | 75                               | 79                                | 66                                         | 63                               | 61                               | 66                                                  |
| Gd   | 97                                        | 87                       | 100                               | 89                                  | 95                               | 96                                | 93                                         | 89                               | 89                               | 97                                                  |
| Tb   | 16                                        | 12                       | 16                                | 13                                  | 16                               | 13                                | 16                                         | 16                               | 16                               | 17                                                  |
| Dy   | 63                                        | 57                       | 65                                | 58                                  | 61                               | 60                                | 60                                         | 57                               | 59                               | 62                                                  |
| Ho   | 59                                        | 50                       | 61                                | 56                                  | 55                               | 55                                | 59                                         | 53                               | 57                               | 62                                                  |
| Er   | 79                                        | 69                       | 80                                | 74                                  | 78                               | 76                                | 70                                         | 69                               | 70                               | 75                                                  |
| Tm   | 44                                        | 38                       | 50                                | 41                                  | 44                               | 46                                | 44                                         | 43                               | 42                               | 47                                                  |
| Yb   | 22                                        | 18                       | 21                                | 21                                  | 22                               | 21                                | 19                                         | 18                               | 18                               | 20                                                  |
| Lu   | 36                                        | 27                       | 33                                | 26                                  | 30                               | 23                                | 26                                         | 30                               | 25                               | 28                                                  |
| Y    | 97                                        | 87                       | 100                               | 91                                  | 96                               | 96                                | 93                                         | 91                               | 91                               | 96                                                  |
| TREE | 82                                        | 72                       | 85                                | 75                                  | 79                               | 80                                | 78                                         | 73                               | 75                               | 82                                                  |

**Table S2.** Individual rare earth extraction levels with simulated sea water (SSW) containing ~ 0.48 mol/L NaCl in the presence of various chelating agents (1:1 ratio)

| Total Extraction (%) (leaching + washing) |     |          |         |                |            |                |             |          |             |         |                         |
|-------------------------------------------|-----|----------|---------|----------------|------------|----------------|-------------|----------|-------------|---------|-------------------------|
| REE                                       | SSW | SSW/EDTA | SSW/NTA | SSW/NTA pH adj | SSW/Citric | SSW/Cit pH adj | SSW/AspAcid | SSW/EDDS | SSW_1/1 GLY | SSW/ASP | SSW/NTA-Na <sub>3</sub> |
| La                                        | 67  | 100      | 69      | 89             | 70         | 70             | 62          | 68       | 66          | 60      | 90                      |
| Ce                                        | 8   | 12       | 12      | 13             | 10         | 11             | 8           | 10       | 7           | 8       | 12                      |
| Pr                                        | 38  | 47       | 42      | 52             | 41         | 41             | 32          | 44       | 40          | 32      | 51                      |
| Nd                                        | 48  | 88       | 75      | 89             | 69         | 68             | 54          | 81       | 61          | 53      | 87                      |
| Sm                                        | 61  | 83       | 69      | 86             | 67         | 67             | 54          | 80       | 66          | 60      | 86                      |
| Eu                                        | 57  | 60       | 61      | 67             | 54         | 55             | 63          | 65       | 52          | 61      | 61                      |
| Gd                                        | 55  | 99       | 83      | 94             | 77         | 79             | 62          | 92       | 63          | 60      | 91                      |
| Tb                                        | 6   | 13       | 13      | 16             | 13         | 14             | 11          | 15       | 10          | 10      | 15                      |
| Dy                                        | 45  | 59       | 55      | 60             | 50         | 53             | 50          | 61       | 51          | 48      | 57                      |
| Ho                                        | 57  | 61       | 61      | 58             | 60         | 63             | 59          | 58       | 54          | 58      | 56                      |
| Er                                        | 54  | 73       | 70      | 72             | 62         | 66             | 58          | 76       | 59          | 56      | 68                      |
| Tm                                        | 24  | 37       | 42      | 45             | 37         | 39             | 30          | 44       | 28          | 27      | 44                      |
| Yb                                        | 11  | 21       | 20      | 20             | 18         | 19             | 13          | 22       | 14          | 12      | 19                      |
| Lu                                        | 24  | 30       | 35      | 27             | 24         | 26             | 20          | 35       | 29          | 16      | 26                      |
| Y                                         | 68  | 100      | 87      | 96             | 81         | 88             | 67          | 100      | 80          | 64      | 90                      |
| TREE                                      | 53  | 80       | 66      | 68             | 62         | 64             | 56          | 71       | 52          | 50      | 76                      |
